# Supplementary material
Source: PubMed Central journal article supplement (PMC3947890)
Supplement: NIHMS126328-supplement-Supplementary_Data.pdf [file NIHMS126328-supplement-Supplementary_Data.pdf]

## Supplemental Data

### A Hierarchical Network of Transcription

#### Factors Governs Androgen

#### Receptor-Dependent Prostate Cancer Growth

Qianben Wang, Wei Li, X. Shirley Liu, Jason S. Carroll,  
Olli A. Jänne, Erika Krasnickas Keeton, Arul M. Chinnaiyan,  
Kenneth J. Pienta, and Myles Brown

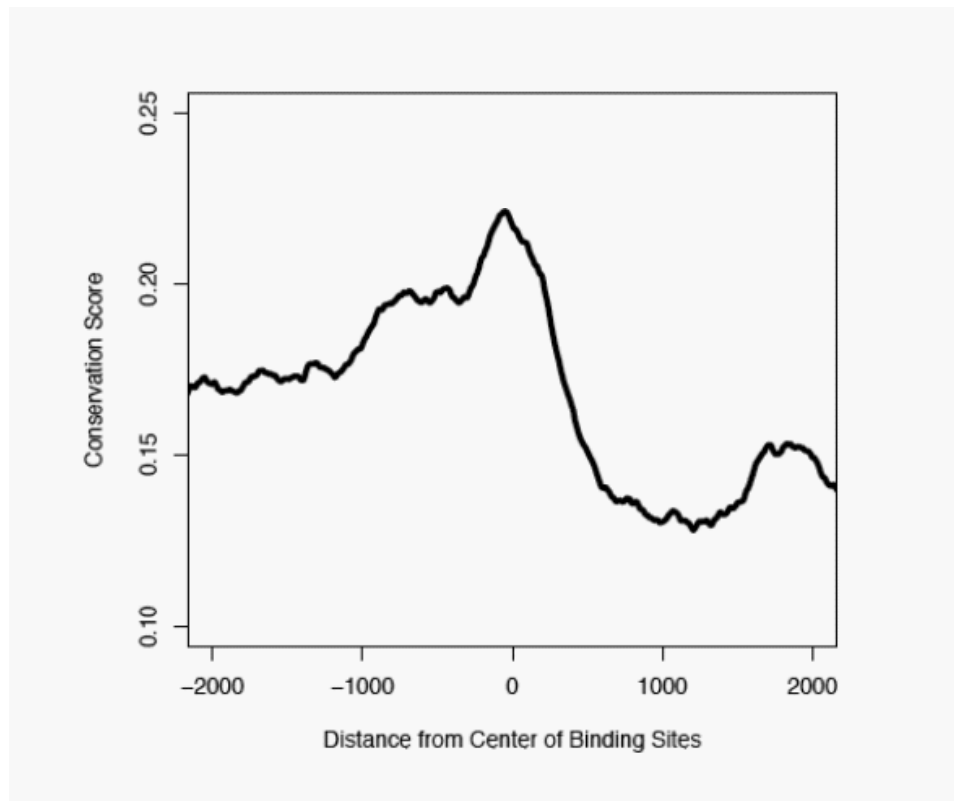

**Figure S1:** Conservation of AR binding sites based on the alignments of 7 vertebrate genomes (chimp, dog, mouse, rat, chicken, fugu and zebrafish) with human. The center of AR binding regions is designated as coordinate 0, and the distance from the center is shown in nucleotides.

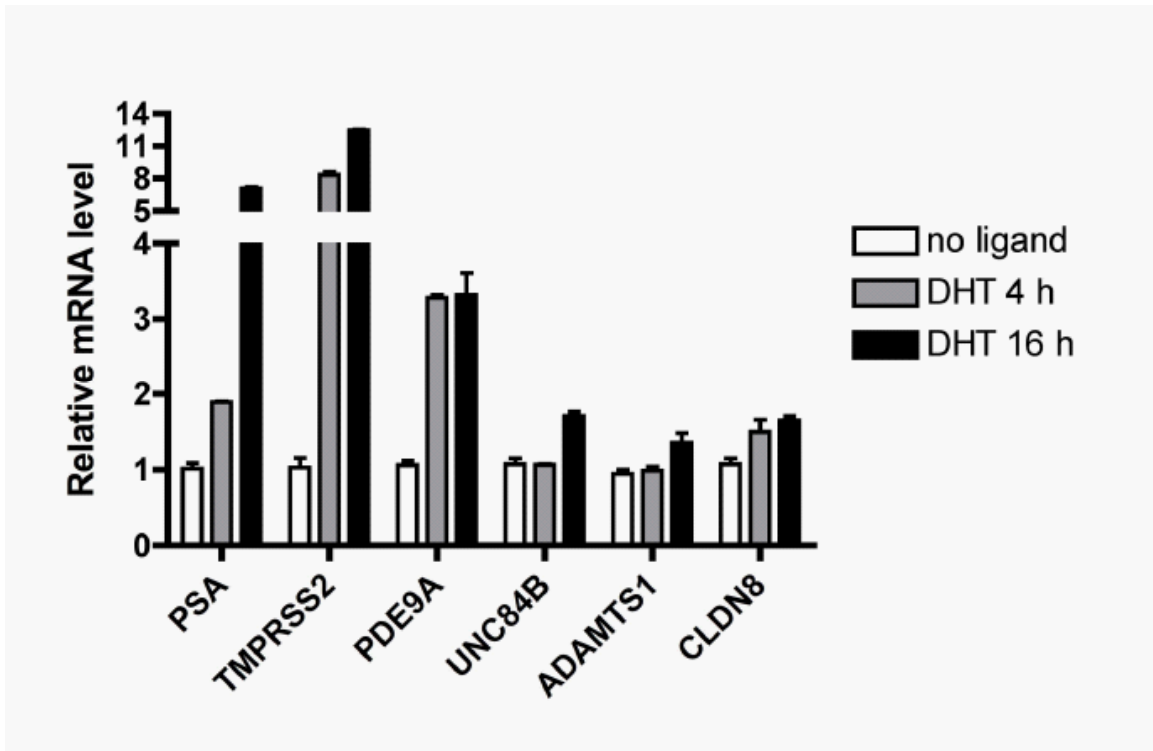

**Figure S2:** Real-time RT-PCR validation of gene expression changes from the U133 plus 2.0 expression array analyses for six target genes: *PSA*, *TMPRSS2*, *PDE9A*, *UNC84B*, *ADAMTS1*, and *CLDN8* (primers are listed in Table S1). The vehicle control was measured at 4 hr. The data were presented as the mean  $\pm$  SE of three replicates.

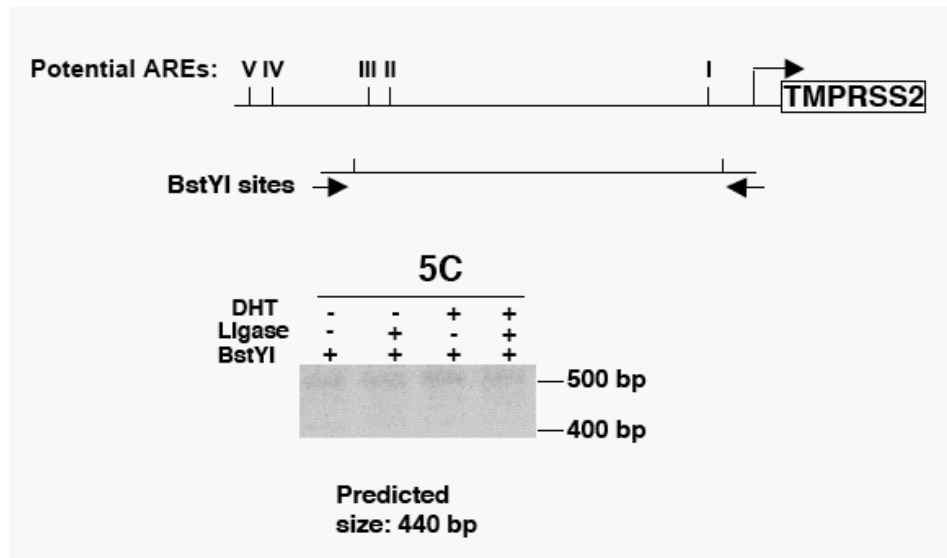

**Figure S3:** Control for 5C assay. 5C was performed using fixed, BstYI digested chromatin from vehicle- or DHT treated LNCaP cells. Primers (Table S1) flanking the -9 kb AR binding region and -700 bp promoter region were used to PCR amplify DNA after ligation.

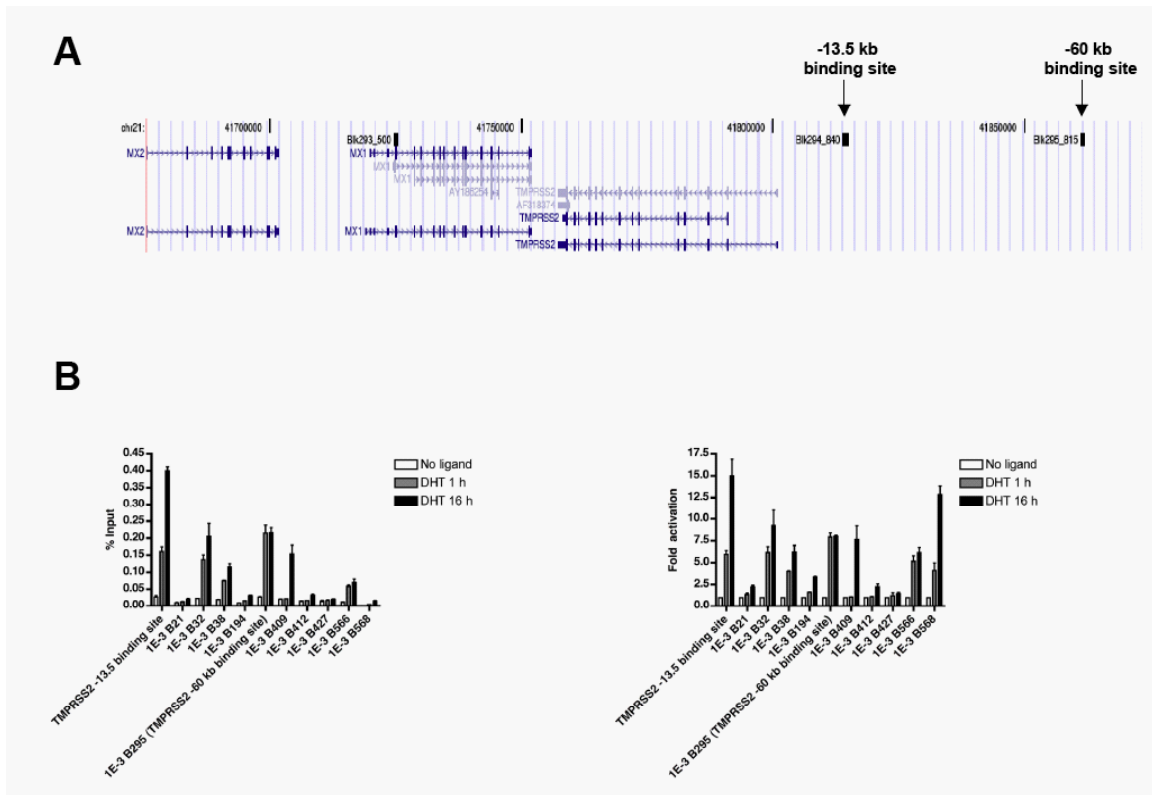

**Figure S4:** Regular ChIP validation of marginally enriched AR binding regions on chromosomes 21 and 22 ( $p\text{-value} < 1E-03$ ). (A) Two AR binding sites relative to the *TMPRSS2* gene. (B) AR ChIP assays were performed on the *TMPRSS2* -13.5 kb, -60 kb binding sites and 9 other randomly selected sites. The results were shown as either percentage input (left) or fold enrichment to vehicle control (right).

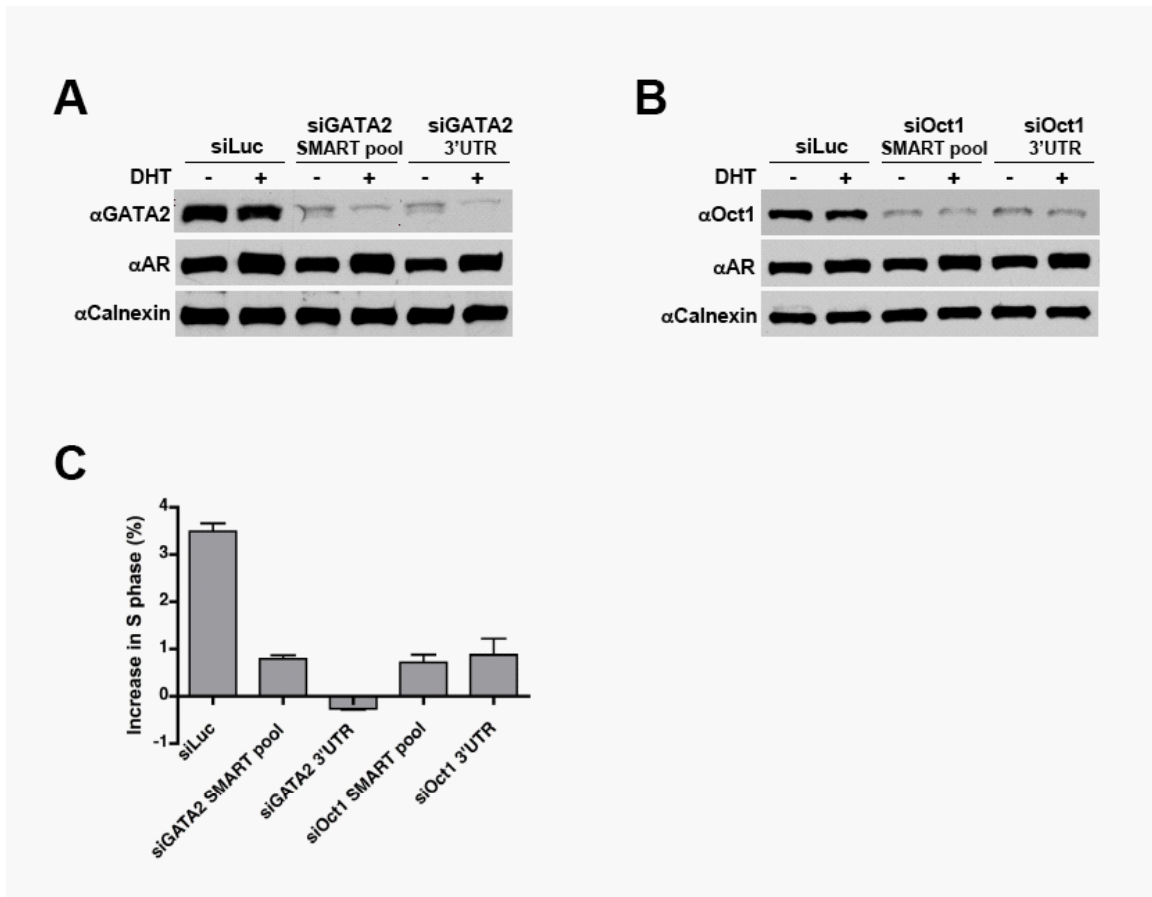

**Figure S5:** Independent GATA2 and Oct1 siRNAs have same effects on decreasing androgen-stimulated cell cycle progression. GATA2 siRNAs (SMART pool and 3'UTR) and Oct1 siRNAs (SMART pool and 3'UTR) were transfected into LNCaP cells. Western blots (A) and (B) were performed as described in Figure 6A and cell cycle analyses (C) were carried out as described in Figure 7D in the presence or absence of 10 nM DHT. Values represent the mean  $\pm$  SE of the two independent experiments (C).

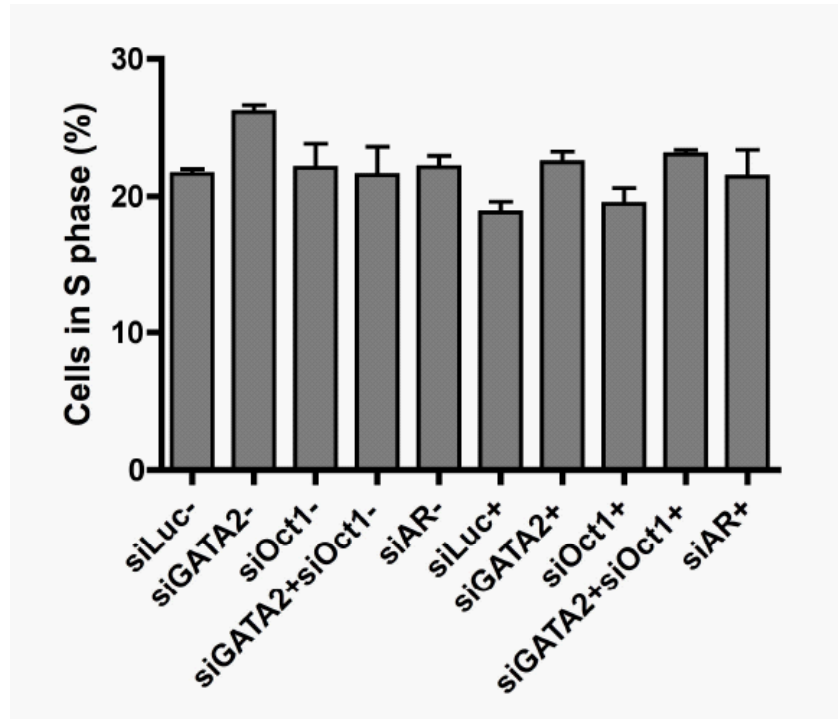

**Figure S6:** Effects of siRNAs on HeLa cell cycle progression. Forty-eight hours after siRNAs transfection, HeLa cells were treated with vehicle or 10 nM DHT for 24 hr. Cell cycle assays were performed as described in Figure 7D.

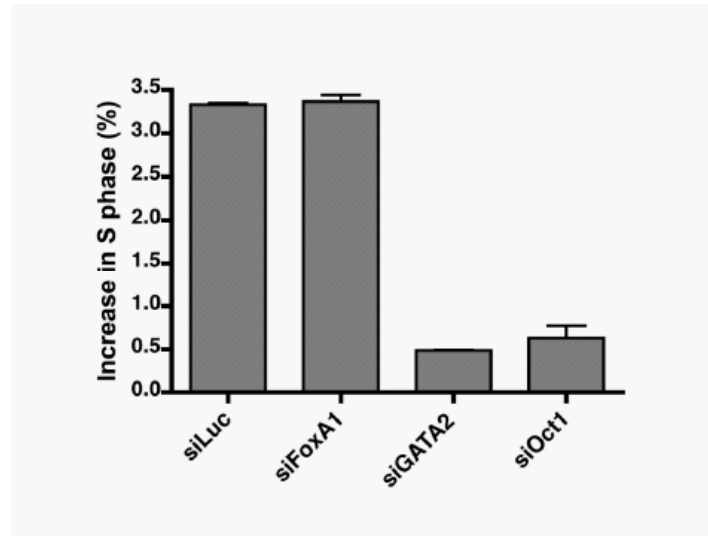

**Figure S7.** Effects of silencing AR collaborating factors on cell cycle progression. Cell cycle analyses were performed as described in Figure 7D in the presence or absence of 10 nM DHT. The results were presented as the mean  $\pm$  SE of the two independent experiments.

**Table S1: Primer and siRNA sequences**

| ChIP real-time PCR primers |                              |
|----------------------------|------------------------------|
| Primer name                | Sequence (5'-3')             |
| B11+                       | CTTATCCCCAAGTTGCTGGAAT       |
| B11-                       | ACGAACAACAGGAATCCATCG        |
| B13+                       | GAAAGGTCACATTTCTAGCTCGTG     |
| B13-                       | AAGATGCTATACACATTCCCAAAACA   |
| B19+                       | CACTACTAAGACATTTTCATTTGGTCCA |
| B19-                       | AAGAATCTCCAGCAAGCTTTGTG      |
| B20+                       | CCAAGAACAATCAGTACATGTGGTG    |
| B20-                       | AAGTGATGGTGATACTATCCTTTGTCA  |
| B21+                       | GACATGGCGTGACTATAAATAAGGAC   |
| B21-                       | GCAAACACCTGGTATCAACAGACT     |
| B27+                       | GAACATGGAGTTCCTGAGAATTTAGG   |
| B27-                       | TGGTCTAGCAGACAGGCAACA        |
| B30+                       | TGCTTGACTGAATAAAGATACGGC     |
| B30-                       | CGGAAGAGTTGTGGGATTTCG        |
| B33+                       | CAGTGGCTTCTCCATCGGAA         |
| B33-                       | CGTGGGCCAGTGTGTAACAG         |
| B35+                       | TGGGCCATTGACCTCATAGAG        |
| B35-                       | AGTCTAATCCTTTGATGCCTGCA      |
| B38+                       | TGTAGGGAGGGAGCCACACT         |
| B38-                       | AATGGCCGGGTGTGCC             |
| B39+                       | TCCAGGCAGAGGTGTGGC           |
| B39-                       | CGTATGTCTCCCTGCACCACT        |
| B40+                       | AAGGCAAACAGAGCTGCACA         |
| B40-                       | TGGTCTGAACGAAGGCGAG          |
| B41+                       | GCCTCCCCCGTGCAG              |
| B41-                       | TGCAAGGCACGTCTCAATTC         |
| B44+                       | CACTCCGTTTCTTAGCCGTGA        |
| B44-                       | AGGCCTGTGGCTCCCC             |
| B46+                       | GAGAAAACCTCTGACCTGCCGG       |
| B46-                       | ACTAAGTCATGGTCGAGTCGGAC      |
| B50+                       | TCACACTTTTGGTATTAGCAAAAGTGA  |
| B50-                       | GCAAGTGCAAAAGACAAGATGC       |
| B51+                       | CCTTCCATATCTATCCAGTGCATTTA   |
| B51-                       | TGGCCTCACACCACTGTTACTT       |
| B52+                       | TGAAATAATGCTGATTCCTGAGATAAG  |
| B52-                       | TGCTGGTGCAGGATTTATTCTACT     |
| B58+                       | CCAAAGGATGCCAAAGTCCA         |
| B58-                       | TGCCTGCATCCGAGAGATTT         |
| B60+                       | CTTGTTATCCACCCTTTGCAGTT      |
| B60-                       | TGACCACGGGAGCCCTAA           |



| <b>ChIP real-time PCR primers<br/>(continued)</b> |                               |
|---------------------------------------------------|-------------------------------|
| <b>Primer name</b>                                | <b>Sequence (5'-3')</b>       |
| B64+                                              | TCTTCCCTAGCCCGTGATCA          |
| B64-                                              | CAGCCTCCTTTGCAGAGCC           |
| B66+                                              | CCAAAGGATGCCAAAGTCCA          |
| B66-                                              | TGCCTGCATCCGAGAGATTT          |
| B70+                                              | CACCACGGAAGGGAGAAAAG          |
| B70-                                              | TGGGTGATGGGCCGG               |
| B71+                                              | AAGTTACACAGGCGGGCG            |
| B71-                                              | CTGCTCAGGTCTCAGAAAAGGAG       |
| B73+                                              | TTTCCATGTTCTTTTGCCTTTGT       |
| B73-                                              | GGCAGTTGGCATTACCCG            |
| B77+                                              | AAGCATGTCAACCTGACCTTCA        |
| B77-                                              | AAAGCACCATAAGTGCTGGCA         |
| B85+                                              | AGGAAAGACCCAGTCCACA           |
| B85-                                              | TACTGAATTGCCCTGACTT           |
| B88+                                              | CCAGATACCCGCCTTACAGC          |
| B88-                                              | GCCCCAGGCACAAAACC             |
| B90+                                              | TTTGGGAGCCAGTGATGGA           |
| B90-                                              | AGCCGCCGCCTGAAGT              |
| PSA enhancer+(Wang et al., 2005)                  | TGGGACAACCTTGCAAACCTG         |
| PSA enhancer-(Wang et al., 2005)                  | CCAGAGTAGGTCTGTTTTCAATCCA     |
| XBP promoter+(Carroll et al., 2005)               | TCTGGAAAGCTCTCGGTTTG          |
| XBP promoter-(Carroll et al., 2005)               | AATCCCTGGCCAAAGGTACT          |
| pol II control+                                   | GATCTTAGTTGCTTTGCCTCTCTTATC   |
| pol II control-                                   | TTTCTTCTCTTGCCCCTGGA          |
| TMPRSS2 14 kb ARE I+                              | CTGAGCCCCCACAAATTGC           |
| TMPRSS2 14 kb ARE I-                              | GGTGGGACACACCTCAGCC           |
| TMPRSS2 14 kb ARE II+                             | TGGATGTTGTCTTTTGTTTTATAATGC   |
| TMPRSS2 14 kb ARE II-                             | TGCCACTGCACTCCATCCT           |
| TMPRSS2 14 kb ARE III+                            | CCAGAAGAATACAATGATTA AAAAGGCT |
| TMPRSS2 14 kb ARE III-                            | TGGA ACTGAAGTATTGGAAAACCA     |
| TMPRSS2 14 kb ARE IV+                             | TCCCAAATCCTGACCCCA            |
| TMPRSS2 14 kb ARE IV-                             | ACCACACAGCCCCTAGGAGA          |
| TMPRSS2 14 kb ARE V+                              | TGGTCCTGGATGATAAAAAAAGTTT     |
| TMPRSS2 14 kb ARE V-                              | GACATACGCCCCACAACAGA          |
| TMPRSS2 -60 kb +                                  | AGGAGGGACCAGAGCCGT            |
| TMPRSS2 -60 kb -                                  | GACACCCAGAAAATACCAGCG         |
| <b>ChIP and 5C assays regular PCR primers</b>     |                               |
| PSA enhancer+(Louie et al., 2003)                 | ATGTTACATTAGTACACCTTGCC       |
| PSA enhancer-(Louie et al., 2003)                 | TCTCAGATCCAGGCTTGCTTACTGTC    |
| TMPRSS2 5CEcoRI+                                  | GAGTGTGGTGACTGGCAAAG          |
| TMPRSS2 5CEcoRI/BstYI-                            | GCCTAGGCTGGCATTCTT            |
| TMPRSS2 5CBtgI+                                   | CTGGTGAACGCAGGTTGCC           |

|                                                                                                                                                                                        |                                                                                                                                                                                                                                                                                          |
|----------------------------------------------------------------------------------------------------------------------------------------------------------------------------------------|------------------------------------------------------------------------------------------------------------------------------------------------------------------------------------------------------------------------------------------------------------------------------------------|
| TMPRSS2 5CBtgI-<br>TMPRSS2 5CBstYI+<br>B38+<br>B38-                                                                                                                                    | GCAGAGTCGACATCAGCAAA<br>ATGAGCATGAGCTGGAGCCC<br>ATCCATCAGCCAACAACCTCC<br>CACTGTGGGTCTCAGGGTTT                                                                                                                                                                                            |
| <b>mRNA real-time RT-PCR primers</b>                                                                                                                                                   |                                                                                                                                                                                                                                                                                          |
| PSA mRNA+<br>PSA mRNA-<br>TMPRSS2 mRNA+<br>TMPRSS2 mRNA-<br>PDE9A mRNA+<br>PDE9A mRNA-<br>UNC84B mRNA+<br>UNC84B mRNA-<br>ADAMTS1 mRNA+<br>ADAMTS1 mRNA-<br>CLDN8 mRNA+<br>CLDN8 mRNA- | TGTGTGCTGGACGCTGGA<br>CACTGCCCCATGACGTGAT<br>GGACAGTGTGCACCTCAAAGAC<br>TCCCACGAGGAAGGTCCC<br>GATCCCAATGTTTGAACAGTGAC<br>TCCCAAAGTGGCTGCAGC<br>ATCAGGACGGCGAGCCTAT<br>CCACCTGGTACGTGGCCA<br>GCCAAAGGCATTGGCTACTTC<br>TGAATCTGGGCTACATGGAG<br>CGGCTGGAATCATCTTCATCA<br>TTGGCAACCCAGCTCACAG |

| <b>Primers for<br/>plasmid<br/>constructions and<br/>mutagenesis</b> |                                             |
|----------------------------------------------------------------------|---------------------------------------------|
| Primer name                                                          | Sequence (5'-3')                            |
| B13 enhancer+                                                        | AGTGGTACCTTTCTGTTAATGCCATCC                 |
| B13 enhancer-                                                        | AGGCTCGAGACATCCCAGGAGGGA                    |
| B30 enhancer+                                                        | GGTGGTACCGCTCTGCTTACACTGGAC                 |
| B30 enhancer-                                                        | AGGCTCGAGCCTAAGTAATGAGTTTCA                 |
| B38 enhancer+                                                        | AGTGGTACCTGTGGCCAGTTATGCCGCA                |
| B38 enhancer-                                                        | AGGCTCGAGGTCTGGTCTGCAGTCCAGTG               |
| B40 enhancer+                                                        | AGTGGTACCAACTCCCTCAAAGATA                   |
| B40 enhancer-                                                        | ATACTCGAGGTGTGAACCAGGGTGA                   |
| B41 enhancer+                                                        | AGTGGTACCCTTATGACTAAGCCTGG                  |
| B41 enhancer-                                                        | ATACTCGAGAGTGGTCTCTCAGCAGAC                 |
| B58 enhancer+                                                        | AGTGGTACCATAACAGCATATAAACAAC                |
| B58 enhancer-                                                        | AGGCTCGAGAACAGGAGATGAGAAAGAG                |
| B71 enhancer+                                                        | AGTGGTACCCCATGCCAGTGAACAGAG                 |
| B71 enhancer-                                                        | AGGCTCGAGCGATCTCAATGGAGCAAC                 |
| B85 enhancer+                                                        | AGTGGTACCCACTCCCGATGACTCCAAAG               |
| B85 enhancer-                                                        | AGGCTCGAGCCTTCTTGTTGAACAGTGGGA              |
| B90 enhancer+                                                        | AGTGGTACCATTCTGTGAGACCGGGTG                 |
| B90 enhancer-                                                        | AGGCTCGAGGGTCCAACCTCCCAA                    |
| B21 enhancer+                                                        | GGTGGTACCTCTATTGTATGTTGATTTC                |
| B21 enhancer-                                                        | AGGCTCGAGCACGACCATTTTAGCTC                  |
| B21 mutated enhancer+                                                | TTATTAGGGTTGGGATGCACACATTTACCTTTGCCAAATCATT |
| B21 mutated enhancer-                                                | AATGATTTGGCAAAGGTAATGTGTGCATCCCAACCCTAATAA  |
| B39 enhancer+                                                        | AGTGGTACCATTGCAATAAGAACTTC                  |
| B39 enhancer-                                                        | AGGCTCGAGGCCTTGTGACACTTCACCC                |

|                       |                                              |
|-----------------------|----------------------------------------------|
| B39 mutated enhancer+ | GTGCAGGGAGACATACGCCCAATGGCCACCTGGTGAAGTGCA   |
| B39 mutated enhancer- | TGCACTTCACCAGGTGGCCATTGGGGCGTATGTCTCCCTGCAC  |
| FKBP5 enhancer+       | AGTGGTACCCTTGGAACACTGATGTG                   |
| FKBP5 enhancer-       | ATACTCGAGCCAGGTTCCACGCCTG                    |
| TMPRSS2 14 kb A+      | CGACGCGTAACCATGGAAAGCAGGTGC                  |
| TMPRSS2 14 kb A-      | CTAGCTAGCAGGGAGGCAGTTGCA                     |
| TMPRSS2 14 kb B+      | CGACGCGTCTGGGTTCTGGAGCTA                     |
| TMPRSS2 14 kb B-      | CTAGCTAGCTCTGGTGTGCTGAGGAC                   |
| TMPRSS2 14 kb C+      | GAACGCGTGATTTGCTTCACCTGGC                    |
| TMPRSS2 14 kb C-      | CCGGCTAGCGCACTATTTCTACTGC                    |
| TMPRSS2 14 kb D+      | CGACGCGTTTCTCTGAACATGTG                      |
| TMPRSS2 14 kb D-      | CCGGCTAGCGGAGATGACTTAATGA                    |
| TMPRSS2 14 kb E+      | CGACGCGTTTCTCGCTCCTCTCA                      |
| TMPRSS2 14 kb E-      | CAGGCTAGCTTATGGGCCTGGCGTGA                   |
| TMPRSS2 14 kb F+      | CTACGCGTGCTCATTGTAGCCTCCG                    |
| TMPRSS2 14 kb F-      | CAGGCTAGCGTAAGATACTGGC                       |
| TMPRSS2 14 kb G+      | CGACGCGTCACCAGTACTTTGATA                     |
| TMPRSS2 14 kb G-      | CAGGCTAGCCTGATACAGCAGCTGCCA                  |
| TMPRSS2 14 kb H+      | CGACGCGTTGGCAGCTGCTGTATC                     |
| TMPRSS2 14 kb H-      | CAGGCTAGCGATCAGGCCTGACCA                     |
| TMPRSS2 14 kb I+      | CGACGCGTTGGTCAGGCCTGATC                      |
| TMPRSS2 14 kb I-      | CAGGCTAGCACCTGCTGCCATGCTCA                   |
| TMPRSS2 14 kb J+      | CAACGCGTTGAGCATGGCAGCAGGTG                   |
| TMPRSS2 14 kb J-      | CAGGCTAGCATGTGGAGCTCAGCG                     |
| TMPRSS2 14 kb K+      | CAACGCGTCACGCTGAGCTCCAC                      |
| TMPRSS2 14 kb K-      | CAGGCTAGCCCATTTAGAAGGCTG                     |
| TMPRSS2 14 kb L+      | CGACGCGTTCAGCCTTCTAAATGG                     |
| TMPRSS2 14 kb L-      | CAGGCTAGCTCTCCAGCACATAGG                     |
| TMPRSS2 14 kb M+      | CGACGCGTCCTATGTGCTGGAGA                      |
| TMPRSS2 14 kb M-      | CAGGCTAGCACCTGCGTTCACCAG                     |
| TMPRSS2 14 kb N+      | CGACGCGTGCCGTGTGAGGCAGATAA                   |
| TMPRSS2 14 kb N-      | TAAGCTAGCCCTCCGCCTCCTGCTTAG                  |
| PSA GATA Mt+          | AACAAATCTGTTGTAAGAGACAGGACAGTAAGCAAGCCTGGAT  |
| PSA GATA Mt-          | ATCCAGGCTTGCTTACTGTCTCTTACAACAGATTTGTT       |
| PSA enhancer Oct Mt+  | GATATCATCTTGCAAGGATGCCCTTGAAACAACAATCCAGAAA  |
| PSA enhancer Oct Mt-  | TTTCTGGATTGTTGTTTCAAGGGCATCCTTGCAAGATGATATC  |
| PSA promoter Oct Mt+  | GTCTTAGGGCACACTGGGTCTCTAGGCACGTGAGGCTTTGTAT  |
| PSA promoter Oct Mt-  | ATACAAAGCCTCACGTGCCTAGAGACCCAGTGTGCCCTAAGAC  |
| TMPRSS2 GATA Mt+      | AATGAAAATGTTGGTCCTGGAAAAAAGTTTTTTCACACAGCAAC |
| TMPRSS2 GATA Mt-      | CTTGCTGTGTGAAAAACTTTTTTCCAGGACCAACATTTTCATT  |
| TMPRSS2 Oct Mt+       | GGGTACGGCAGGTACTIONACTTACCAGGTGGCCATTTGT     |
| TMPRSS2 Oct Mt-       | ACAAATGGCCACCTGGTGAAGTATATGAGTACCTGCCGTACCC  |

| <b>siRNA sense sequences</b> |                         |
|------------------------------|-------------------------|
| siRNA name                   | Sense sequences (5'-3') |
| siLuc(Wang et al., 2005)     | CACUUACGCUGAGUACUUCGA   |
| siFoxA1 <sup>2</sup>         | GAGAGAAAAAAUCAACAGC     |
| siGATA2(SMART pool           | (1)UCGAGGAGCUGUCAAGUG   |
| sequences from Dharmcon)     | (2)ACUACAAGCUGCACAUGU   |
|                              | (3)GAAGAGCCGGCACCUGUUG  |
|                              | (4)GCCCAGGCCUAGCUACUUA  |
| siGATA2 (3'UTR)              | ACCCUUAGCAGCCCAGCAU     |
| siOct1 (SMART pool           | (1)GAAGAAACGCACCAGCAUA  |
| sequences from Dharmcon)     | (2)GGACAGAUAAACUGGGCUUA |
|                              | (3)CAACACAGCAACCGUGAUU  |
|                              | (4)ACACCAAAGCGAAUUGAUA  |
| siOct1(3'UTR)                | CUGCCAGCCAGGUUAAUAAUC   |
| siAR (SMART pool             | (1)GGAACUCGAUCGUAUCAUU  |
| sequences from Dharmcon)     | (2)CAAGGGAGGUUACACCAA   |
|                              | (3)UCAAGGAACUCGAUCGUAU  |
|                              | (4)GAAAUGAUUGCACUAUUGA  |

**Table S2.** Differentially expressed transcripts on chromosomes 21 and 22. Each gene symbols, the RefSeq and accession numbers, probe set are provided. The fold change and p-value of androgen treatment (4 hr and 16 hr) versus vehicle control is showed.

| Symbol         | RefSeq                                                                                        | Probe set    | Accession    | Fold(4 h) | p-value(4 h) | Fold(16 h) | p-value(16 h) |
|----------------|-----------------------------------------------------------------------------------------------|--------------|--------------|-----------|--------------|------------|---------------|
| LOC440161      | XM_498572 /// XM_498913                                                                       | 243762_at    | BF001177     | 2.88      | 0.003004     | 12.13      | 0.006335      |
| TMPRSS2        | NM_005656                                                                                     | 226553_at    | A1660243     | 6.54      | 0.000012     | 7.4        | 0.002968      |
| TMPRSS2        | NM_005656                                                                                     | 211689_s_at  | AF270487     | 6.21      | 0.00031      | 7.34       | 0.003332      |
| TMPRSS2        | NM_005656                                                                                     | 205102_at    | NM_005656    | 5.29      | 0.00011      | 5.83       | 0.004185      |
| LOC389048      | XM_374013                                                                                     | 242881_x_at  | BG285837     | 1.4       | 0.037191     | 2.11       | 0.004351      |
| LOC440160      | XM_498571                                                                                     | 239010_at    | A1744280     | 0.95      | 0.264726     | 1.92       | 0.006999      |
| FLJ30428       | XM_986937                                                                                     | 226809_at    | AW188087     | 1.12      | 0.088746     | 1.84       | 0.01049       |
| ---            | XM_497220                                                                                     | 228116_at    | AW167298     | 1.08      | 0.149194     | 1.71       | 0.006262      |
| ---            | XM_498570                                                                                     | 242546_at    | BE738279     | 1.07      | 0.057075     | 1.68       | 0.003937      |
| ---            | XM_498570                                                                                     | 231882_at    | AL530703     | 0.95      | 0.368628     | 1.58       | 0.012677      |
| ---            | ---                                                                                           | 235445_at    | BF965166     | 1.4       | 0.022127     | 1.55       | 0.021044      |
| PDE9A          | NM_001001567 /// NM_001001568 /// NM_001001569 /// NM_001001570 /// NM_001001571              | 205593_s_at  | NM_002606    | 1.52      | 0.003156     | 1.45       | 0.008983      |
| CLDN8          | NM_199328                                                                                     | 214598_at    | AL049977     | 1.45      | 0.001024     | 1.42       | 0.004003      |
| ADAMTS1        | NM_006988                                                                                     | 222486_s_at  | AF060152     | 0.95      | 0.355998     | 1.41       | 0.000787      |
| PRR5           | NM_015366 /// NM_017701 /// NM_181333                                                         | 219160_s_at  | NM_017701    | 0.92      | 0.421874     | 1.35       | 0.007429      |
| ADAMTS1        | NM_006988                                                                                     | 222162_s_at  | AK023795     | 1.01      | 0.131073     | 1.32       | 0.000757      |
| ---            | ---                                                                                           | 218358_at    | NM_024324    | -0.98     | 0.31343      | 1.31       | 0.025719      |
| C21orf4        | NM_006134                                                                                     | 225182_at    | AL355685     | -0.95     | 0.459743     | 1.31       | 0.000933      |
| C21orf106      | NM_015151 /// NM_206889 /// NM_206890 /// NM_206891                                           | 227199_at    | AW027812     | 1.06      | 0.108578     | 1.3        | 0.000806      |
| UNC84B         | NM_015374                                                                                     | 212144_at    | AL021707     | -1.03     | 0.078084     | 1.26       | 0.012726      |
| STCH           | NM_006948                                                                                     | 202557_at    | A1718418     | 1.06      | 0.032244     | 1.23       | 0.010954      |
| GSTT2          | NM_000854                                                                                     | 205439_at    | NM_000854    | 0.9       | 0.505869     | 1.22       | 0.045052      |
| C22orf9        | NM_001009880 /// NM_015264                                                                    | 212421_at    | AB023147     | 0.93      | 0.633891     | 1.22       | 0.024506      |
| KIAA0153       | NM_015140                                                                                     | 216251_s_at  | BF965437     | 1.02      | 0.067989     | 1.22       | 0.000728      |
| AP1B1          | NM_001127 /// NM_145730                                                                       | 205423_at    | NM_001127    | 1.01      | 0.148625     | 1.21       | 0.001708      |
| KRT18          | NM_000224 /// NM_199187                                                                       | 201596_x_at  | NM_000224    | -0.96     | 0.567413     | 1.18       | 0.042099      |
| C22orf8        | NM_017911                                                                                     | 219629_at    | NM_017911    | -0.89     | 0.555275     | 1.18       | 0.010052      |
| C21orf4        | NM_006134                                                                                     | 219600_s_at  | NM_006134    | -1.01     | 0.161066     | 1.17       | 0.004024      |
| CGI-96 /// d32 | /// NM_015703                                                                                 | 202938_x_at  | NM_015703    | -0.87     | 0.981442     | 1.16       | 0.016005      |
| SYN1           | NM_003895 /// NM_203446                                                                       | 212990_at    | AB020717     | 1.76      | 0.007333     | 1.16       | 0.045435      |
| TRPM2          | NM_001001188 /// NM_003307                                                                    | 205708_s_at  | AI051254     | -1.03     | 0.10008      | 1.15       | 0.012701      |
| ARFGAP3        | NM_014570                                                                                     | 202211_at    | BC005122     | -0.95     | 0.678644     | 1.14       | 0.022065      |
| LSS            | NM_001001438 /// NM_002340                                                                    | 202245_at    | AW084510     | 0.93      | 0.947085     | 1.14       | 0.049552      |
| ---            | ---                                                                                           | 232390_at    | AL137344     | 0.95      | 0.702908     | 1.14       | 0.010846      |
| ATXN10         | NM_013236                                                                                     | 208832_at    | AW241832     | 0.93      | 0.77761      | 1.13       | 0.012443      |
| GAS2L1         | NM_006478 /// NM_152236 /// NM_152237                                                         | 209729_at    | BC001782     | 0.98      | 0.366676     | 1.13       | 0.042922      |
| PP2447         | NM_025204                                                                                     | 225360_at    | AL449244     | 0.9       | 0.896766     | 1.13       | 0.017823      |
| KIAA0153       | NM_015140                                                                                     | 1552257_a    | at NM_015140 | 0.98      | 0.303255     | 1.13       | 0.009713      |
| C22orf9        | NM_001009880 /// NM_015264                                                                    | 217118_s_at  | AK025608     | -0.93     | 0.902374     | 1.11       | 0.014551      |
| TBC1D10A       | NM_031937                                                                                     | 226613_at    | A1742029     | 0.98      | 0.258789     | 1.11       | 0.031212      |
| PACSLIN2       | NM_007229                                                                                     | 1554691_a    | at BC008037  | 0.95      | 0.662284     | 1.11       | 0.036146      |
| NHP2L1         | NM_001003796 /// NM_005008                                                                    | 201076_at    | NM_005008    | -1.07     | 0.021123     | 1.1        | 0.012501      |
| C21orf56       | NM_032261                                                                                     | 223360_at    | AL136871     | 0.92      | 0.740066     | 1.1        | 0.036932      |
| RIPK4          | NM_020639                                                                                     | 221215_s_at  | NM_020639    | 1.12      | 0.033472     | 1.08       | 0.069483      |
| XBP1           | NM_005080                                                                                     | 200670_at    | NM_005080    | -1.13     | 0.008085     | 1.07       | 0.015995      |
| ZNF278         | NM_014323 /// NM_032050 /// NM_032051 /// NM_032052                                           | 209431_s_at  | AF254083     | -1.14     | 0.010689     | -1         | 0.199289      |
| ZNF294         | NM_015565                                                                                     | 215596_s_at  | AL163248     | -1.13     | 0.026142     | -1.02      | 0.160258      |
| MRPL39         | NM_017446 /// NM_080794                                                                       | 218558_s_at  | NM_017446    | -0.95     | 0.481575     | -1.11      | 0.028839      |
| DSCR5          | NM_016430 /// NM_153681 /// NM_153682                                                         | 221689_s_at  | AB035745     | -0.99     | 0.231436     | -1.11      | 0.02614       |
| LOC493856      | NM_001008388                                                                                  | 226686_at    | A1188518     | -1.01     | 0.115249     | -1.12      | 0.004637      |
| LOC493856      | NM_001008388                                                                                  | 226689_at    | A1749451     | -0.99     | 0.239383     | -1.13      | 0.020667      |
| BTG3           | NM_006806                                                                                     | 205548_s_at  | NM_006806    | -0.99     | 0.245993     | -1.14      | 0.009717      |
| FBX07          | NM_012179                                                                                     | 1554423_a    | at AF233225  | -0.99     | 0.230398     | -1.14      | 0.034168      |
| FBX07          | NM_012179                                                                                     | 201178_at    | NM_012179    | -1.06     | 0.021811     | -1.16      | 0.003118      |
| MRPS6          | NM_032476                                                                                     | 224919_at    | AL555227     | -1.11     | 0.035043     | -1.21      | 0.010546      |
| TNRC6B         | XM_039385                                                                                     | 213254_at    | N64803       | -1.15     | 0.026846     | -1.24      | 0.005497      |
| ZCWC3          | NM_015358                                                                                     | 213000_at    | AP000693     | -1.13     | 0.05195      | -1.26      | 0.014335      |
| ABCG1          | NM_004915 /// NM_016818 /// NM_207174 /// NM_207627 /// NM_207628 /// NM_207629 /// NM_207630 | 204567_s_at  | NM_004915    | -1.12     | 0.082917     | -1.31      | 0.031335      |
| ---            | XM_496541                                                                                     | 1569608_x    | at BC016022  | -1.07     | 0.096193     | -1.42      | 0.002574      |
| APOBEC3B       | NM_004900                                                                                     | 206632_s_at  | NM_004900    | -0.85     | 0.612873     | -1.56      | 0.026041      |
| ANKRD20A       | /// NM_001012419 /// NM_001012421 /// NM_032250 /// NM_153750 /// XM_496541                   | 1569607_s_at | BC016022     | -1.17     | 0.028292     | -1.57      | 0.001149      |

**Table S3:** List of AR binding sites and adjacent androgen-regulated gene locations. Distance to gene transcription start site, gene Refseq number and a brief description, chromosome number, the start and stop site of each AR binding site, block number and length of each AR binding region and  $-10 \times \log_{10}(\text{p-value})$  are provided.

| Distance   | RefSeq number and gene description                                    | Chromosome | Start    | End      | Blk number and length | minus 10Xlog10 (p-value) |
|------------|-----------------------------------------------------------------------|------------|----------|----------|-----------------------|--------------------------|
| -828.277   | NM_153750 : C21orf81, hypothetical protein LOC114035                  | chr21      | 13446058 | 13446660 | Blk1_602              | 65.7                     |
| -356.978   | NM_153750 : C21orf81, hypothetical protein LOC114035                  | chr21      | 13917408 | 13917908 | Blk2_500              | 54.8                     |
| 324.214    | NM_006948 : STCH, stress 70 protein chaperone,                        | chr21      | 15001344 | 15001844 | Blk3_500              | 51.7                     |
| 779.576    | NM_006948 : STCH, stress 70 protein chaperone,                        | chr21      | 15456706 | 15457206 | Blk4_300              | 33.9                     |
| 1,203.697  | NM_006948 : STCH, stress 70 protein chaperone,                        | chr21      | 15880827 | 15881327 | Blk5_500              | 54.1                     |
| 1,595.497  | NM_006948 : STCH, stress 70 protein chaperone,                        | chr21      | 16272627 | 16273127 | Blk6_500              | 52.7                     |
| 690.352    | NM_006806 : BTG3, B-cell translocation gene 3                         | chr21      | 18597133 | 18597633 | Blk7_500              | 50.5                     |
| 2,252.040  | NM_006806 : BTG3, B-cell translocation gene 3                         | chr21      | 20158821 | 20159321 | Blk8_500              | 52.8                     |
| 3,967.944  | NM_006806 : BTG3, B-cell translocation gene 3                         | chr21      | 21874727 | 21875227 | Blk9_500              | 52.2                     |
| -2,036.712 | NM_017446 : MRPL39, mitochondrial ribosomal protein L39 isoform a     | chr21      | 23044709 | 23045209 | Blk10_500             | 64.9                     |
| -2,082.948 | NM_017446 : MRPL39, mitochondrial ribosomal protein L39 isoform a     | chr21      | 23818447 | 23818947 | Blk11_554             | 95.5                     |
| -1,564.814 | NM_017446 : MRPL39, mitochondrial ribosomal protein L39 isoform a     | chr21      | 24336608 | 24337108 | Blk12_500             | 54.5                     |
| 257.956    | NM_017446 : MRPL39, mitochondrial ribosomal protein L39 isoform a     | chr21      | 26159379 | 26159879 | Blk13_500             | 62                       |
| 531.312    | NM_017446 : MRPL39, mitochondrial ribosomal protein L39 isoform a     | chr21      | 26432734 | 26433234 | Blk14_500             | 63                       |
| 276.156    | NM_006988 : ADAMTS1, a disintegrin and metalloprotease with           | chr21      | 27415506 | 27416006 | Blk15_500             | 52.6                     |
| 309.964    | NM_006988 : ADAMTS1, a disintegrin and metalloprotease with           | chr21      | 27449315 | 27449815 | Blk16_500             | 68.3                     |
| 480.956    | NM_006988 : ADAMTS1, a disintegrin and metalloprotease with           | chr21      | 27620305 | 27620805 | Blk17_500             | 70.8                     |
| -682.656   | NM_015565 : ZNF294, zinc finger protein 294                           | chr21      | 28604189 | 28604689 | Blk18_500             | 65.8                     |
| -552.908   | NM_015565 : ZNF294, zinc finger protein 294                           | chr21      | 28733770 | 28734270 | Blk19_836             | 96.6                     |
| -35.112    | NM_015565 : ZNF294, zinc finger protein 294                           | chr21      | 29251373 | 29252598 | Blk20_1225            | 151.3                    |
| 153.176    | NM_015565 : ZNF294, zinc finger protein 294                           | chr21      | 29440023 | 29440523 | Blk21_500             | 51.8                     |
| 157.156    | NM_015565 : ZNF294, zinc finger protein 294                           | chr21      | 29443961 | 29444461 | Blk22_583             | 64                       |
| 265.314    | NM_199328 : CLDN8, claudin 8                                          | chr21      | 30775252 | 30775752 | Blk23_500             | 63.5                     |
| 364.732    | NM_199328 : CLDN8, claudin 8                                          | chr21      | 30874580 | 30875080 | Blk24_683             | 103.6                    |
| 405.556    | NM_199328 : CLDN8, claudin 8                                          | chr21      | 30915493 | 30915993 | Blk25_500             | 53.8                     |
| 1,052.240  | NM_199328 : CLDN8, claudin 8                                          | chr21      | 31562178 | 31562678 | Blk26_500             | 58.5                     |
| -486.392   | NM_203446 : SYNJ1, synaptotagmin 1 isoform b                          | chr21      | 32535463 | 32535963 | Blk27_500             | 51.1                     |
| -175.200   | NM_006134 : TMEM50B, transmembrane protein 50B                        | chr21      | 33598585 | 33599085 | Blk28_675             | 76.4                     |
| 282.476    | NM_032476 : MRPS6, mitochondrial ribosomal protein S6                 | chr21      | 34084966 | 34085466 | Blk29_500             | 72.2                     |
| 995.424    | NM_015358 : MORC3, MORC family CW-type zinc finger 3                  | chr21      | 35618703 | 35619203 | Blk30_500             | 68                       |
| 682.596    | NM_015358 : MORC3, MORC family CW-type zinc finger 3                  | chr21      | 35931531 | 35932031 | Blk31_500             | 53.9                     |
| 192.800    | NM_015358 : MORC3, MORC family CW-type zinc finger 3                  | chr21      | 36421327 | 36421827 | Blk32_500             | 51.8                     |
| -284.104   | NM_153681 : DSCR5, phosphatidylinositol                               | chr21      | 37083468 | 37083968 | Blk33_500             | 59.1                     |
| 1,007.840  | NM_153682 : DSCR5, phosphatidylinositol                               | chr21      | 38374844 | 38375344 | Blk34_525             | 67.6                     |
| 1,067.004  | NM_153682 : DSCR5, phosphatidylinositol                               | chr21      | 38434017 | 38434517 | Blk35_500             | 55.3                     |
| 1,877.356  | NM_153682 : DSCR5, phosphatidylinositol                               | chr21      | 39244349 | 39244849 | Blk36_545             | 79.8                     |
| -1,062.740 | NM_005656 : TMRSS2, transmembrane protease, serine 2                  | chr21      | 40738958 | 40739458 | Blk37_500             | 62.5                     |
| -462.388   | NM_005656 : TMRSS2, transmembrane protease, serine 2                  | chr21      | 41338902 | 41340223 | Blk38_1321            | 94.6                     |
| 13.548     | NM_005656 : TMRSS2, transmembrane protease, serine 2                  | chr21      | 41813164 | 41813664 | Blk39_664             | 64.6                     |
| -18.424    | NM_001001567 : PDE9A, phosphodiesterase 9A isoform b                  | chr21      | 42965006 | 42965506 | Blk40_597             | 107.8                    |
| -77.824    | NM_001001567 : PDE9A, phosphodiesterase 9A isoform b                  | chr21      | 43024503 | 43025003 | Blk41_500             | 54.4                     |
| 372.760    | NM_001001188 : TRPM2, transient receptor potential cation channel,    | chr21      | 44224742 | 44225242 | Blk42_825             | 65.9                     |
| -396.324   | NM_001001188 : TRPM2, transient receptor potential cation channel,    | chr21      | 44993987 | 44994487 | Blk43_500             | 50.7                     |
| -752.548   | NM_001001188 : TRPM2, transient receptor potential cation channel,    | chr21      | 45349880 | 45350380 | Blk44_1159            | 140.1                    |
| -829.136   | NM_001001188 : TRPM2, transient receptor potential cation channel,    | chr21      | 45426746 | 45427246 | Blk45_600             | 71.5                     |
| -872.476   | NM_001001188 : TRPM2, transient receptor potential cation channel,    | chr21      | 45470119 | 45470619 | Blk46_536             | 73.7                     |
| -694.120   | NM_032261 : C21orf56, hypothetical protein LOC84221                   | chr21      | 45734360 | 45734860 | Blk47_500             | 51.3                     |
| -379.184   | NM_032261 : C21orf56, hypothetical protein LOC84221                   | chr21      | 46049292 | 46049792 | Blk48_500             | 53.1                     |
| 76.012     | NM_015151 : C21orf106, DIP2-like protein isoform a                    | chr21      | 46626352 | 46626852 | Blk49_1905            | 81.1                     |
| -7,973.878 | NM_000854 : GSTT2, glutathione S-transferase theta 2                  | chr22      | 14653495 | 14654622 | Blk50_1127            | 99.8                     |
| -7,968.730 | NM_000854 : GSTT2, glutathione S-transferase theta 2                  | chr22      | 14658956 | 14659456 | Blk51_500             | 56.8                     |
| -7,836.959 | NM_000854 : GSTT2, glutathione S-transferase theta 2                  | chr22      | 14790636 | 14791136 | Blk52_683             | 85.1                     |
| -7,073.373 | NM_000854 : GSTT2, glutathione S-transferase theta 2                  | chr22      | 15554313 | 15554813 | Blk53_500             | 58.5                     |
| -7,045.991 | NM_000854 : GSTT2, glutathione S-transferase theta 2                  | chr22      | 15581695 | 15582195 | Blk54_500             | 59.3                     |
| -5,387.958 | NM_000854 : GSTT2, glutathione S-transferase theta 2                  | chr22      | 17039463 | 17040463 | Blk55_1031            | 110.7                    |
| -5,312.776 | NM_000854 : GSTT2, glutathione S-transferase theta 2                  | chr22      | 17114462 | 17115462 | Blk56_1395            | 130.5                    |
| -5,453.978 | NM_000854 : GSTT2, glutathione S-transferase theta 2                  | chr22      | 17173708 | 17174208 | Blk57_500             | 50.7                     |
| -5,434.968 | NM_000854 : GSTT2, glutathione S-transferase theta 2                  | chr22      | 17192236 | 17193236 | Blk58_1462            | 338.4                    |
| -5,396.068 | NM_000854 : GSTT2, glutathione S-transferase theta 2                  | chr22      | 17231203 | 17232203 | Blk59_1330            | 114                      |
| -4,856.660 | NM_000854 : GSTT2, glutathione S-transferase theta 2                  | chr22      | 17771027 | 17771527 | Blk60_500             | 68.9                     |
| -3,907.702 | NM_000854 : GSTT2, glutathione S-transferase theta 2                  | chr22      | 18719568 | 18720568 | Blk61_1333            | 110.7                    |
| -3,666.566 | NM_000854 : GSTT2, glutathione S-transferase theta 2                  | chr22      | 18960790 | 18961790 | Blk62_1160            | 115.2                    |
| -3,609.202 | NM_000854 : GSTT2, glutathione S-transferase theta 2                  | chr22      | 19018484 | 19019484 | Blk63_500             | 52.3                     |
| -2,804.000 | NM_000854 : GSTT2, glutathione S-transferase theta 2                  | chr22      | 19823222 | 19824222 | Blk64_1430            | 333.4                    |
| -2,761.426 | NM_000854 : GSTT2, glutathione S-transferase theta 2                  | chr22      | 19866158 | 19867158 | Blk65_705             | 101.5                    |
| -2,683.696 | NM_000854 : GSTT2, glutathione S-transferase theta 2                  | chr22      | 19943507 | 19944507 | Blk66_1464            | 344.7                    |
| -2,643.440 | NM_000854 : GSTT2, glutathione S-transferase theta 2                  | chr22      | 19983922 | 19984922 | Blk67_1147            | 105.6                    |
| -2,637.100 | NM_000854 : GSTT2, glutathione S-transferase theta 2                  | chr22      | 19990586 | 19991586 | Blk68_500             | 54.6                     |
| -2,529.376 | NM_000854 : GSTT2, glutathione S-transferase theta 2                  | chr22      | 20098309 | 20099309 | Blk69_500             | 51.6                     |
| -2,241.148 | NM_000854 : GSTT2, glutathione S-transferase theta 2                  | chr22      | 20386495 | 20387495 | Blk70_587             | 77.7                     |
| -1,400.962 | NM_000854 : GSTT2, glutathione S-transferase theta 2                  | chr22      | 21226647 | 21227647 | Blk71_654             | 89.2                     |
| -492.764   | NM_000854 : GSTT2, glutathione S-transferase theta 2                  | chr22      | 22134923 | 22135923 | Blk72_500             | 61.5                     |
| -434.552   | NM_000854 : GSTT2, glutathione S-transferase theta 2                  | chr22      | 23081177 | 23082177 | Blk73_500             | 50.5                     |
| -1,619.062 | NM_000854 : GSTT2, glutathione S-transferase theta 2                  | chr22      | 24265688 | 24266688 | Blk74_500             | 61                       |
| 104.074    | NM_005080 : XBP1, X-box binding protein 1                             | chr22      | 27624921 | 27625421 | Blk75_537             | 61.9                     |
| 28.844     | NM_001127 : AP1B1, adaptor-related protein complex 1 beta 1 subunit   | chr22      | 28137717 | 28138217 | Blk76_500             | 56.3                     |
| 129.024    | NM_001127 : AP1B1, adaptor-related protein complex 1 beta 1 subunit   | chr22      | 28237771 | 28238271 | Blk77_754             | 98.2                     |
| 534.224    | NM_014323 : ZNF278, zinc finger protein 278 long C isoform            | chr22      | 30600779 | 30601279 | Blk78_500             | 50.5                     |
| -1,458.496 | NM_015374 : UNC94B, unc-94 homolog B                                  | chr22      | 36017703 | 36018203 | Blk79_500             | 51.6                     |
| -574.140   | NM_015374 : UNC94B, unc-94 homolog B                                  | chr22      | 36902057 | 36902557 | Blk80_500             | 58                       |
| 31.792     | NM_015374 : UNC94B, unc-94 homolog B                                  | chr22      | 37507991 | 37508491 | Blk81_300             | 34.9                     |
| -1,058.860 | NM_004900 : APOBEC3B, apolipoprotein B mRNA editing enzyme, catalytic | chr22      | 38761515 | 38762015 | Blk82_500             | 52.2                     |
| -1,345.044 | NM_004900 : APOBEC3B, apolipoprotein B mRNA editing enzyme, catalytic | chr22      | 39047698 | 39048198 | Blk83_500             | 54.8                     |
| -723.852   | NM_005008 : NHP2L1, NHP2 non-histone chromosome protein 2-like 1      | chr22      | 39678954 | 39679454 | Blk84_500             | 50.2                     |
| -21.944    | NM_015264 : C22orf9, hypothetical protein LOC23313 isoform a          | chr22      | 43906460 | 43907460 | Blk85_961             | 102.8                    |
| 92.544     | NM_017911 : C22orf8, hypothetical protein LOC55007                    | chr22      | 44118644 | 44119144 | Blk86_500             | 60.2                     |
| -146.192   | NM_013236 : ATXN10, ataxin 10                                         | chr22      | 44334163 | 44334663 | Blk87_300             | 37                       |
| -1,398.484 | NM_013236 : ATXN10, ataxin 10                                         | chr22      | 45785608 | 45786108 | Blk88_2198            | 206                      |
| -1,540.192 | NM_013236 : ATXN10, ataxin 10                                         | chr22      | 45927204 | 45927704 | Blk89_2423            | 86.3                     |
| -1,620.736 | NM_013236 : ATXN10, ataxin 10                                         | chr22      | 46008479 | 46008979 | Blk90_958             | 117.2                    |

**Table S4.** List of typical AREs and non-typical AREs in 90 AR binding regions. Four types non-typical ARE: 1) ARE half-site, AGAACA (score cutoff is 7.0, corresponding to its exact match); 2) ARE head to head, AGAACA[0-8n]TGTTCT; 3) ARE tail to tail, TGTTCT[0-8n]AGAACA; 4) ARE direct repeat, AGAACA[0-8n]AGAACA (type 2 to 4, score cutoff 8.5, allowing the 0-8 bases variable gap between two AR half-sites) and typical ARE (AGAACA<sub>n</sub>TGTTCT) (score cutoff 8.5, allowing only 3 bases gap between two AR half-sites) are listed for 90 AR binding regions.



| Typical ARE | AR half-site         | Head to Head        | Tail to Tail        | Direct Repeat        |
|-------------|----------------------|---------------------|---------------------|----------------------|
| BIK1        | 7.3 TGTTC            | 8.9 TGAAC 6 TGTTC   | 8.7 TGTCC 3 ACAACA  | 8.9 TGAAC 6 TGTTC    |
| BIK2        |                      |                     |                     |                      |
| BIK3        |                      |                     |                     |                      |
| BIK4        |                      |                     |                     | 8.9 TGGTCT 0 TGATCT  |
| BIK5        |                      | 8.6 AGAAAA 5 TTTTCT |                     | 8.7 AGGACA 2 AGAAAA  |
| BIK6        |                      |                     |                     | 8.9 AGAGCA 4 AGCACA  |
| BIK7        | 7.3 TGTTC            |                     | 8.9 TGTCC 2 AGAAC   | 8.6 TTTTCT 4 TATTCT  |
| BIK8        |                      |                     |                     |                      |
| BIK9        |                      |                     |                     | 8.6 AGAATA 4 AGAAAA  |
| BIK10       |                      | 8.7 AAAACA 6 TGGTCT | 8.6 TGTTT 3 AAAACA  | 8.6 TGTTT 2 TGTTT    |
| BIK11       | 7.3 TGTTC            |                     |                     | 8.7 TTCTCT 8 TGTTC   |
| BIK12       |                      |                     | 8.7 TGTCA 4 AGAAAA  |                      |
| BIK13       | 7.3 TGTTC            | 8.6 AAAACA 1 TTTTCT | 11.6 TGTTC 2 ACAACA | 8.6 ACAACA 2 AGAAAA  |
| BIK14       |                      |                     |                     |                      |
| BIK15       |                      |                     | 8.7 TGTCA 5 ATAACA  | 8.9 AGAGCA 4 AGAACG  |
| BIK16       | 7.3 AGAACA           | 8.7 ACAACA 0 TGACT  |                     | 11.6 AAAACA 8 AGAACA |
| BIK17       | 7.3 TGTTC            |                     | 14.6 TGTTC 3 AGAACA | 8.7 ATTTCT 3 TGTTC   |
| BIK18       | 7.3 TGTTC            | 8.7 AAAACA 7 TGTTC  |                     | 8.7 TTTTCT 0 TGTTC   |
| BIK19       | 8.9 AGTACA 3 TGTGCT  |                     |                     | 8.6 TGTTT 0 TGTTT    |
| BIK20       |                      | 7.3 AGAACA          | 8.7 AGAAC 4 TGTGT   | 8.6 AAAATA 8 AGAACA  |
| BIK21       | 8.9 AGTACA 3 TGTCC   |                     |                     |                      |
| BIK22       |                      | 7.3 TGTTC           | 8.7 AGAAGA 0 GGTTC  | 8.6 TTTTGT 7 TGTTC   |
| BIK23       |                      | 7.3 TGTTC           |                     | 8.7 TGTTC 8 TGTAC    |
| BIK24       | 8.9 AGAACA 3 TGATCA  | 7.3 AGAACA          |                     | 8.9 AGAACA 3 TGATCA  |
| BIK25       |                      |                     |                     |                      |
| BIK26       |                      |                     |                     | 8.7 TATTCT 0 TGTTC   |
| BIK27       |                      |                     |                     |                      |
| BIK28       |                      |                     |                     | 8.7 TTTTCT 3 GGTTC   |
| BIK29       | 7.3 TGTTC            | 8.9 AGGACT 1 TGTTC  |                     | 8.6 AGAAGA 5 AGAATA  |
| BIK30       | 7.3 TGTTC            | 11.6 AGAATA 7 TGTTC | 8.7 TTTTCT 0 AGATCA | 11.6 TATTCT 3 TGTTC  |
| BIK31       | 7.3 TGTTC            |                     | 8.7 TGTTC 7 CCAACA  | 8.9 TGTTC 3 TGATCC   |
| BIK32       |                      |                     |                     |                      |
| BIK33       | 7.3 AGAACA           |                     |                     | 8.7 AGAACA 1 TAAACA  |
| BIK34       | 7.3 AGAACA           |                     | 8.9 TGTACT 5 AGCACA | 8.9 GGAACC 0 AGAACA  |
| BIK35       | 7.3 AGAACA           |                     | 8.9 TGACCT 5 AGAACA | 8.7 TGATCT 1 TGTGT   |
| BIK36       | 7.3 AGAACA           |                     | 8.7 ATTTCT 7 AGAACA | 8.9 AGAACA 5 GGAGCA  |
| BIK37       |                      | 8.7 GCAACA 7 TGTTC  |                     | 8.7 AGAACA 6 GAAACA  |
| BIK38       | 11.7 AGAACA 3 TGTGCT | 7.3 AGAACA          | 8.6 AGAAGA 8 TGTTT  | 8.9 TGATCA 2 AGAACA  |
| BIK39       |                      |                     | 8.7 ACAACA 8 TGTCCT |                      |
| BIK40       |                      | 7.3 TGTTC           |                     | 8.7 TGATT 4 TGTTC    |
| BIK41       | 14.6 AGAACA 3 TGTTC  | 7.3 TGTTC           |                     | 8.9 TGGCT 5 TGTTC    |
| BIK42       |                      |                     |                     | 8.6 TTTTCT 8 TCTTCT  |
| BIK43       |                      |                     |                     |                      |
| BIK44       |                      | 7.3 TGTTC           | 8.7 AGAACA 8 TGATGT | 8.9 TGTCC 5 AGATCA   |
| BIK45       |                      |                     | 8.7 AGACCA 8 TGTGT  |                      |
| BIK46       |                      | 7.3 AGAACA          | 8.6 AGAACA 2 TCTTT  | 8.9 AGTTCT 2 TGTTC   |
| BIK47       |                      |                     |                     |                      |
| BIK48       |                      |                     |                     |                      |
| BIK49       |                      |                     |                     |                      |
| BIK50       |                      | 7.3 TGTTC           | 8.6 AGAAAA 2 TCTTCT | 8.7 TGTTC 2 TGTGAT   |
| BIK51       |                      | 7.3 AGAACA          | 8.7 TGCTAT 6 AGAACA | 8.7 AGATCA 8 AAAACA  |
| BIK52       | 8.7 AGAAGA 3 AGTTCT  |                     |                     |                      |
| BIK53       |                      |                     |                     |                      |
| BIK54       |                      |                     |                     | 8.7 TGTAT 1 TGTGCT   |
| BIK55       |                      | 8.7 AGAAAA 5 TGTTC  |                     | 8.7 TGTGCT 8 TTTTCT  |
| BIK56       | 7.3 AGAACA           | 8.9 AGAACA 2 TGGCCT | 11.7 TGTTC 5 AGAACA | 8.7 TGTAT 7 TGTGCT   |
| BIK57       | 7.3 AGAACA           | 8.6 AGAATA 0 TTTTCT |                     | 8.7 AGAACA 3 AGAAC   |
| BIK58       | 7.3 TGTTC            | 8.7 ATAACA 4 AGTTCT | 8.7 TTTTCT 5 AGAAC  | 8.9 TGGCT 5 TGTTC    |
| BIK59       |                      | 8.7 AGAAAA 5 TGTTC  |                     | 8.7 TGTGCT 8 TTTTCT  |
| BIK60       |                      |                     |                     |                      |
| BIK61       |                      | 8.7 GGAACA 5 TTTTCT |                     | 8.7 AGAAAA 8 AGCACA  |
| BIK62       |                      | 8.7 AGAAAA 5 TGTTC  |                     | 8.7 TGTGCT 8 TTTTCT  |
| BIK63       | 7.3 AGAACA           | 8.7 AGAACA 7 TGATTT |                     | 8.6 TGTTT 5 TGTTT    |
| BIK64       | 7.3 AGAACA           | 8.9 GGAACA 8 TGTTC  | 8.9 CGTACT 7 AGAACA | 8.9 GGTACA 1 AGAACA  |
| BIK65       |                      | 8.7 GGAACA 5 TTTTCT |                     | 8.7 AGAAAA 8 AGCACA  |
| BIK66       | 7.3 TGTTC            | 8.7 ATAACA 4 AGTTCT | 8.7 TTTTCT 5 AGAAC  | 8.9 TGGCT 5 TGTTC    |
| BIK67       |                      | 8.7 AGAAAA 5 TGTTC  |                     | 8.7 TGTGCT 8 TTTTCT  |
| BIK68       |                      |                     |                     |                      |
| BIK69       |                      |                     | 8.7 TGTTT 8 AGATCA  |                      |
| BIK70       | 7.3 TGTTC            |                     |                     | 8.9 GGTACT 6 TGTTC   |
| BIK71       |                      | 8.7 AGACCA 1 TGTTT  | 8.9 TGTCA 7 GGAACA  | 8.6 AAAACA 1 AAAACA  |
| BIK72       |                      |                     |                     |                      |
| BIK73       | 7.3 TGTTC            | 8.7 AAAACA 1 TGATCT | 8.7 TGTTC 8 AGACTA  | 11.6 TGTTC 8 TGTTT   |
| BIK74       |                      |                     |                     |                      |
| BIK75       | 7.3 TGTTC            |                     |                     | 8.9 TGTTC 5 TGACCT   |
| BIK76       | 7.3 AGAACA           | 8.7 AGAACA 4 TGTTC  | 8.6 TCTTT 8 AGAACA  | 8.9 TGTTC 5 TGCTCT   |
| BIK77       | 7.3 TGTTC            | 8.9 GGCACA 6 TGTTC  | 8.6 TGTTC 0 AAAAGA  | 8.7 AGAACA 4 AGATGA  |
| BIK78       | 7.3 AGAACA           | 8.7 AGAAAA 4 TGCTCT | 8.9 TGCTCT 6 AGACCA | 8.7 TGAACA 5 AGAAAA  |
| BIK79       | 8.9 AGAACA 3 TGTGCC  | 7.3 AGAACA          |                     | 8.7 AAAACT 4 AGAACA  |
| BIK80       |                      |                     |                     |                      |
| BIK81       |                      |                     |                     |                      |
| BIK82       | 8.9 AGAACA 3 TGCACT  | 7.3 AGAACA          |                     | 8.9 AGAACA 8 AGAGCG  |
| BIK83       |                      | 7.3 TGTTC           | 8.9 TGACCT 1 AGAACA | 8.9 GGTTC 3 TGTTC    |
| BIK84       |                      |                     |                     |                      |
| BIK85       |                      | 7.3 TGTTC           | 8.7 TGTTC 7 TTAACA  | 8.6 AGAAAA 1 ACAACA  |
| BIK86       | 11.7 AGGACA 3 TGTTC  | 7.3 TGTTC           |                     | 8.6 TTTTCT 3 TGTGT   |
| BIK87       |                      |                     |                     | 8.9 AGACCA 3 AGAGCA  |
| BIK88       |                      | 7.3 AGAACA          |                     | 8.7 TGTTC 1 TGTGT    |
| BIK89       |                      |                     |                     |                      |
| BIK90       |                      | 7.3 AGAACA          |                     |                      |

## **Supplemental Experimental Procedures**

### **ChIP-on-chip data analysis**

To ensure there is only one probe measurement within any 1 kb window, the short-range (< 1 kb) repetitive probe measurements in tiling arrays were filtered out as previously described (Li et al., 2005). Quantile normalization (Bolstad et al., 2003) was used to make the distribution of probe intensities the same across all arrays. A generalized Mann-Whitney U-test, considering probe by probe variability, was then used for the ChIP-enriched region detection. Briefly, (PM-MM) values for each probe are transformed into ranks across the ChIP and control experiments to remove probe variability, followed by regular Mann-Whitney U-test on the ranks over each 1 kb sliding window. The p-value was derived from the null hypothesis that the treatment set median is no larger than that of the control set. Two treatments (100 nM DHT 1 hr and 16 hr) and two controls (vehicle and genomic input) experiments were performed (3 biological replicates each). The ChIP-enriched regions were identified for each treatment against each control (1 hr-vehicle, 1 hr-input, 16 hr-vehicle, 16 hr-input,) using a stringent p-value cutoff 1E-05. The resulting four sets of regions were merged together to form the 90 nonredundant AR binding regions.

### **Sequence analysis**

The repeat-masked genomic DNA of every AR binding regions was retrieved from <http://genome.ucsc.edu>. We applied the MDscan motif finding algorithm (Liu et al., 2002) on the 90 AR binding regions ranked by p-value score, but could not find any sequence pattern resembling the typical palindrome ARE consensus (AGAACA<sub>n</sub>TTGTTCT) (Verrijdt et al., 2003).

We used the positional weight matrix to scan the entire AR binding regions for the inexact matches to the typical and non-typical AREs. The positional weight matrix for AR half-site is derived directly from the ARE consensus as AGAACA. We determined how well a given sequence segment of width  $w$  matched a motif (positional weight matrix) as the maximum score from the following scoring formula applied on the sequence segment itself and its reverse complement:

$$S = \sum_{i=1}^w \sum_{j \in \{A,C,G,T\}} \delta_{ij} \ln\left(\frac{p_{ij} + p_s}{b_j}\right)$$

Where  $p_{ij}$  is the frequency of nucleotide  $j$  at position  $i$  in the motif,  $p_s$  is a pseudocount of 0.04,  $b_j$  is the background probability of nucleotide  $j$  calculated from the intergenic regions of the human genome.  $\delta_{ij} = 1$  if nucleotide  $j$  is present at position  $i$ ;  $\delta_{ij} = 0$  otherwise. The score for typical ARE is computed by summing the 12 positional weights corresponding to the ARE consensus, allowing 3-nt spacing between two half-sites. Despite choosing a relatively loose score cutoff of 8.5 (corresponding to up to 2 bases difference from the ARE consensus), we identified only 9 ARE occurrences in the 90 AR binding regions. For non-typical ARE, we allowed a variable gap of 0-8 bases between the two AR half-sites and allowed the AR half-sites to be in all possible orientations (Verrijdt et al., 2003) including head to head AGAACA[0-8n]TGTTCT, tail to tail TGTTCT[0-8n]AGAACA, and direct repeat AGAACA[0-8n]AGAACA. The score cutoff (8.5) is the same for the typical ARE. We also considered the exact matches to the AR half-site (score cutoff 7.0) as another kind of non-typical AREs.

In order to identify the cooperative binding partner of AR, we mapped all the mammalian transcription factor motifs in the TRANSFAC database (Matys et al., 2003)

to the nonrepetitive sequences of human chromosomes 21 and 22. We chose score cutoffs from 4.0 to 14.0 at 0.5 intervals for each TRANSFAC motif, and required the minimum number of motif hits in the 90 AR binding regions to be greater than 20. For each motif at each score cutoff, we calculated the fold-enrichment of this motif co-occurring with AR half-site in the 90 AR binding regions compared with that in the human chromosomes 21 and 22 genomic background. When we ranked all the motifs by the maximum fold-change, Forkhead, GATA, Oct motifs that are associated with AR half-site came on top of the list. The p-value associated with each fold-change was derived from the one-tailed binomial test.

We expanded all 90 AR binding sites equally in both directions to 4 kb long. The phastCons (Siepel et al., 2005) conservation scores for alignments of 7 vertebrate genomes (chimp, dog, mouse, rat, chicken, fugu and zebrafish) with human were downloaded from <http://genome.ucsc.edu>. The conservation score of each nucleotide in the expanded binding region is further defined as the average phastCons scores of a 500-mer window centered at the nucleotide.

### **ChIP and re-ChIP**

Antibodies used were as follows: anti-RNA pol II (8WG16) from Covance (Berkeley, CA), anti-AR (N20), anti-TRAP220 (M255), anti-HNF3 $\alpha$  (H120), anti-GATA2 (H116), anti-Oct1 (C21), and rabbit IgG (sc2027) from Santa Cruz Biotechnology (Santa Cruz, CA). For re-ChIP assays, ChIPs were first performed with anti-AR antibodies (N20). The immunoprecipitated complexes were washed, eluted with 10 mM dithiothreitol at 37 °C for 30 min and diluted 50 times with ChIP dilution buffer. The second

immunoprecipitation were then performed with IgG or indicated antibodies. The PCR primers for ChIP and re-ChIP are listed in Table S1.

### **Reporter gene assays**

Twenty-four hours after transfection, cells were treated with 100 nM DHT or vehicle for another 24 hr and then harvested. Transfection efficiency was normalized by co-transfection of pRL promoter renilla luciferase vector (Promega). Firefly and renilla luciferase activity were measured using the Dual-Glo luciferase assay kit (Promega).

### **Co-immunoprecipitation and Western blotting**

Hormone-depleted LNCaP cells were treated with or without 100 nM DHT for 24 hr. The cells were lysed in 1 ml of ice-cold buffer A. The lysate was rotated for 1 hr at 4°C and precleared by 25 µl of packed protein A-Sepharose. 10 µg IgG or specific antibodies against AR collaborating factors were then added and immunoprecipitation was performed overnight. After immunoprecipitation, 25 µl of packed protein A-Sepharose were added for 1 hr and the beads were washed with lysis buffer A twice. The precipitated protein complexes were fractionated by 8% SDS-PAGE and Western blotting were performed with an anti-AR (441) antibody. The same membranes were then reprobbed with antibodies against AR collaborating factors. Antibodies used were anti-AR (441), anti-HNF3 $\alpha$  (H120), anti-GATA2 (H116), anti-GATA2 (CG296), anti-Oct1 (C21), and anti-Oct1 (12F11) from Santa Cruz Biotechnology, anti-FoxA1 (ab5095) from Abcam (Cambridge, CA).

### **Supplemental References**

Bolstad, B. M., Irizarry, R. A., Astrand, M., and Speed, T. P. (2003). A comparison of normalization methods for high density oligonucleotide array data based on variance and bias. *Bioinformatics* 19, 185-193.

Carroll, J. S., Liu, X. S., Brodsky, A. S., Li, W., Meyer, C. A., Szary, A. J., Eeckhoute, J., Shao, W., Hestermann, E. V., Geistlinger, T. R., *et al.* (2005). Chromosome-wide mapping of estrogen receptor binding reveals long-range regulation requiring the forkhead protein FoxA1. *Cell* *122*, 33-43.

Li, W., Meyer, C. A., and Liu, X. S. (2005). A hidden Markov model for analyzing ChIP-chip experiments on genome tiling arrays and its application to p53 binding sequences. *Bioinformatics* *21 Suppl 1*, i274-i282.

Liu, X. S., Brutlag, D. L., and Liu, J. S. (2002). An algorithm for finding protein-DNA binding sites with applications to chromatin-immunoprecipitation microarray experiments. *Nat Biotechnol* *20*, 835-839.

Louie, M. C., Yang, H. Q., Ma, A. H., Xu, W., Zou, J. X., Kung, H. J., and Chen, H. W. (2003). Androgen-induced recruitment of RNA polymerase II to a nuclear receptor-p160 coactivator complex. *Proc Natl Acad Sci U S A* *100*, 2226-2230.

Matys, V., Fricke, E., Geffers, R., Gossling, E., Haubrock, M., Hehl, R., Hornischer, K., Karas, D., Kel, A. E., Kel-Margoulis, O. V., *et al.* (2003). TRANSFAC: transcriptional regulation, from patterns to profiles. *Nucleic Acids Res* *31*, 374-378.

Siepel, A., Bejerano, G., Pedersen, J. S., Hinrichs, A. S., Hou, M., Rosenbloom, K., Clawson, H., Spieth, J., Hillier, L. W., Richards, S., *et al.* (2005). Evolutionarily conserved elements in vertebrate, insect, worm, and yeast genomes. *Genome Res* *15*, 1034-1050.

Verrijdt, G., Haelens, A., and Claessens, F. (2003). Selective DNA recognition by the androgen receptor as a mechanism for hormone-specific regulation of gene expression. *Mol Genet Metab* *78*, 175-185.

Wang, Q., Carroll, J. S., and Brown, M. (2005). Spatial and temporal recruitment of androgen receptor and its coactivators involves chromosomal looping and polymerase tracking. *Mol Cell* *19*, 631-642.
